# Supplementary material
Source: MDPI journal article supplement (https://www.mdpi.com/2076-3263/9/4/157)
Supplement: s1 [file s1]

## Supplementary Materials

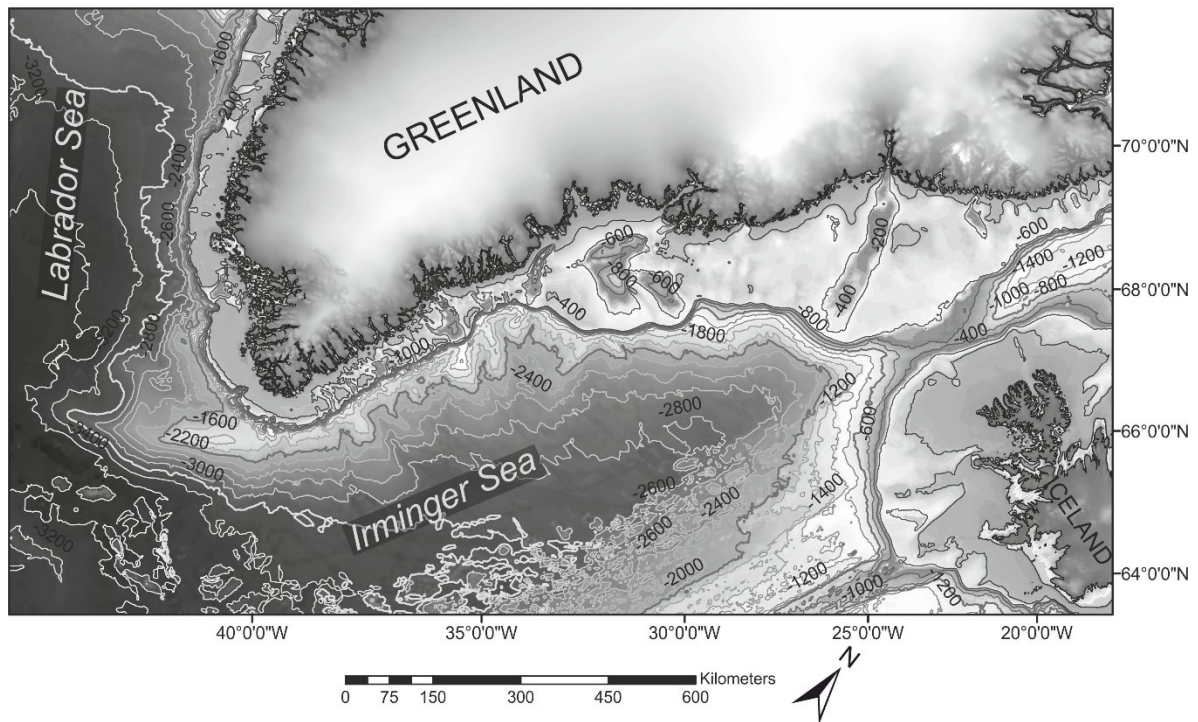

**Figure S1.** Extract of the International Bathymetric Chart of the Arctic Ocean (IBCAO) [18] showing the Southeast Greenland margin. Contour lines are drawn every 200 m.

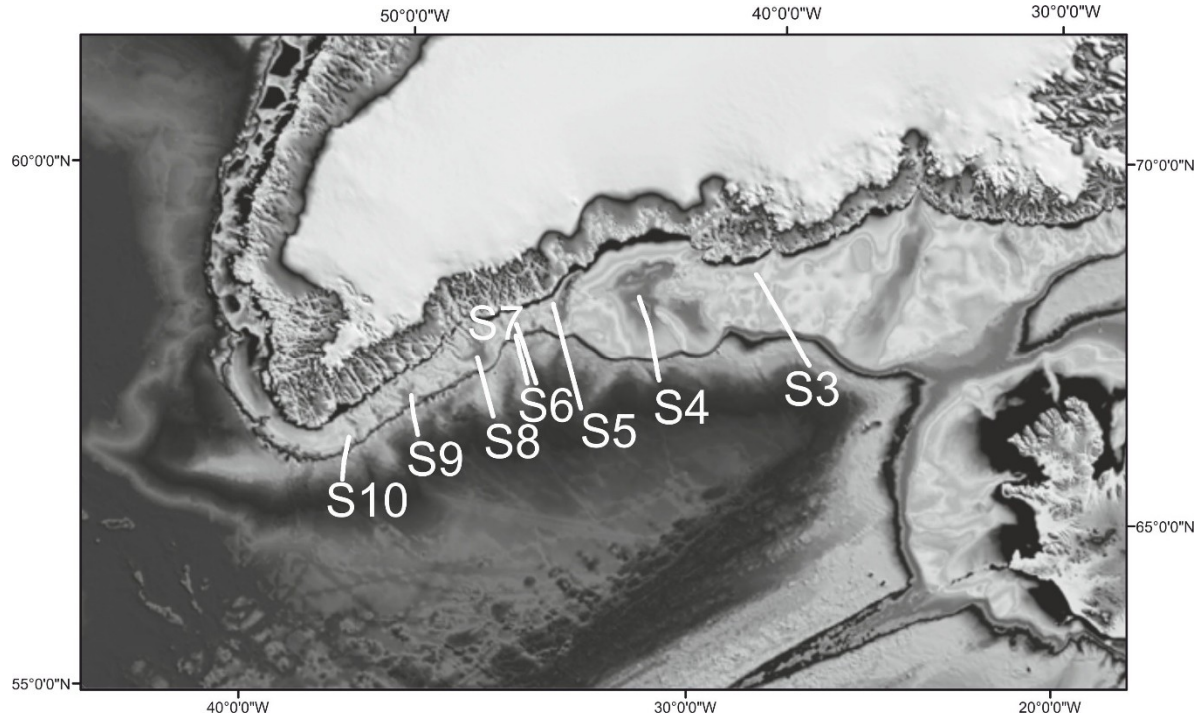

**Figure S2.** Location map of the seismic profiles provided as Supplementary Figures S3 to S10.

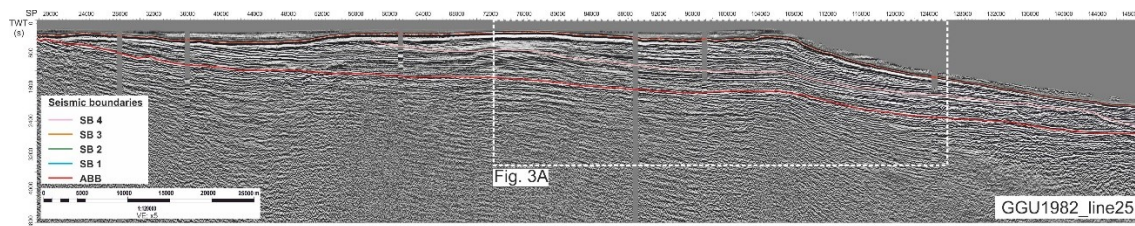

**Figure S3.** Seismic across slope profile. Its location is shown in Supplementary Figure S2.

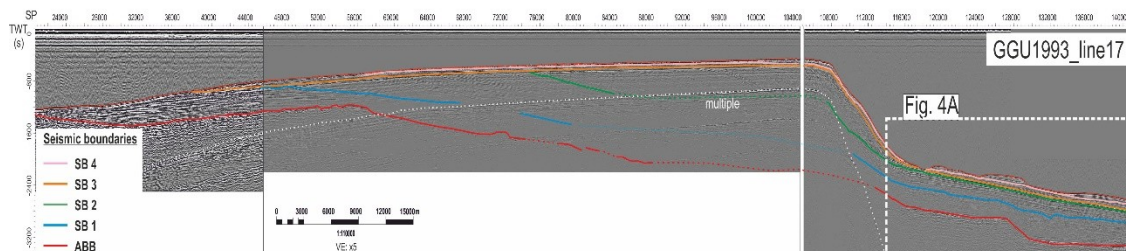

**Figure S4.** Seismic across slope profile. Its location is shown in Supplementary Figure S2.

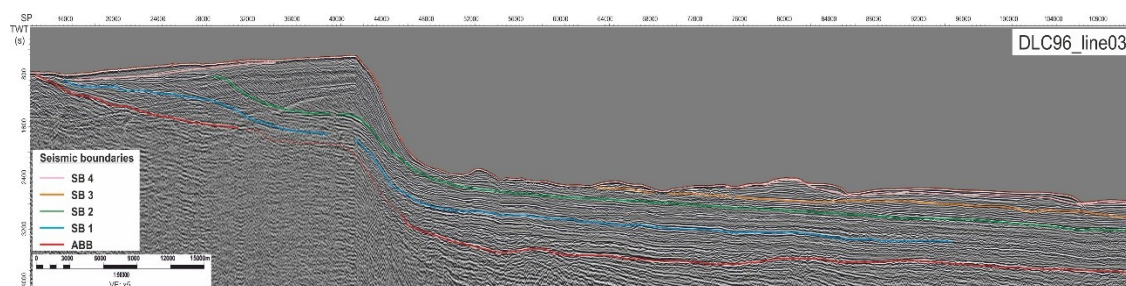

**Figure S5.** Seismic across slope profile. Its location is shown in Supplementary Figure S2.

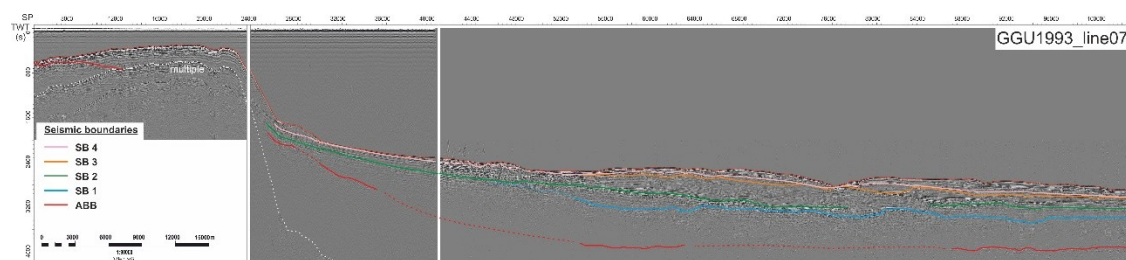

**Figure S6.** Seismic across slope profile. Its location is shown in Supplementary Figure S2.

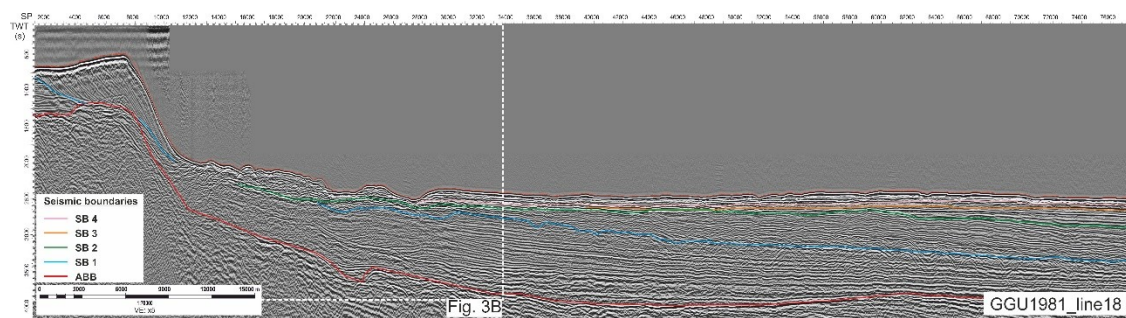

**Figure S7.** Seismic across slope profile. Its location is shown in Supplementary Figure S2.



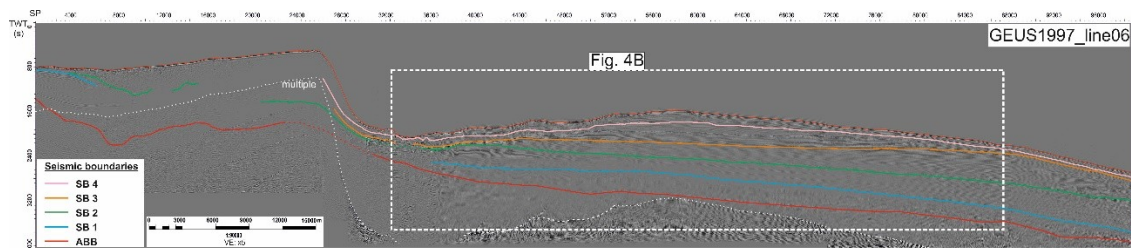

**Figure S8.** Seismic across slope profile. Its location is shown in Supplementary Figure S2.

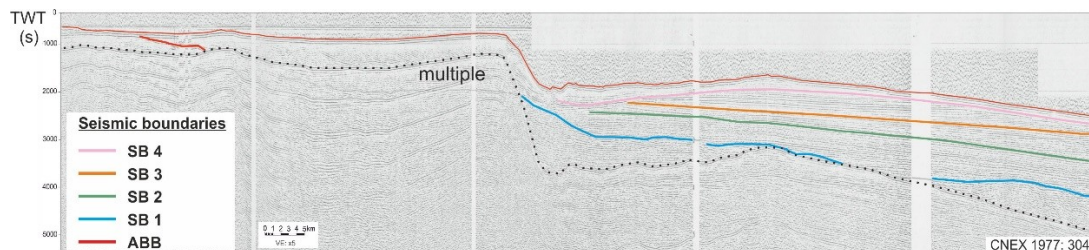

**Figure S9.** Seismic across slope profile. Its location is shown in Supplementary Figure S2.

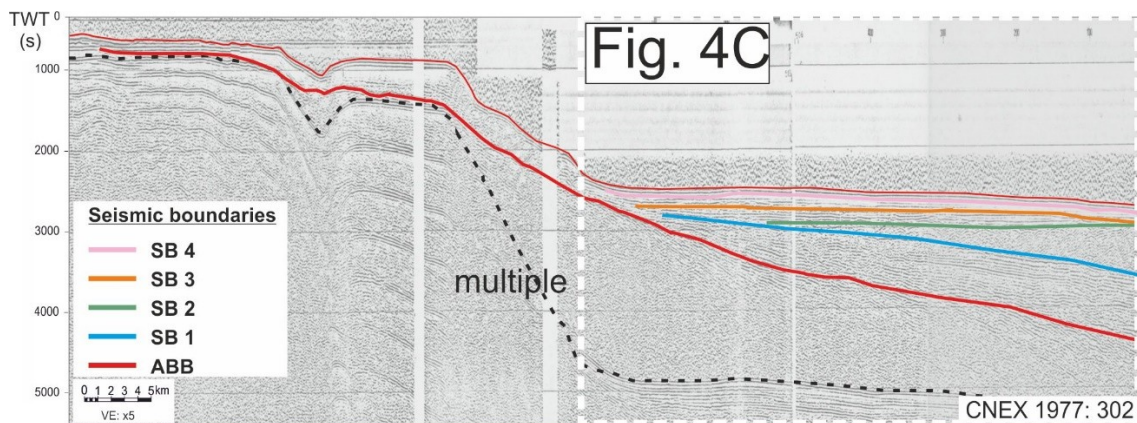

**Figure S10.** Seismic across slope profile. Its location is shown in Supplementary Figure S2.
